# Supplementary material for: Evaluation of Anti-Inflammatory and Atheroprotective Properties of Wheat Gluten Protein Hydrolysates in Primary Human Monocytes
Source: PubMed Central journal article supplement (PMC7404777; doi:10.3390/foods9070854), 2020-06-30
Supplement: foods-09-00854-s001.pdf [file foods-09-00854-s001.pdf]

### Supplementary Materials:

**Table S1.** Chemical composition of WGPC. Values, presented as percentage in dry basis, are mean  $\pm$  standard deviation of triplicates.

| (%)                 | WGPC             |
|---------------------|------------------|
| Protein             | 89.24 $\pm$ 0.06 |
| Ash                 | 0.92 $\pm$ 0.20  |
| Fibre               | 2.43 $\pm$ 0.22  |
| Oil                 | 1.47 $\pm$ 0.08  |
| Soluble sugars      | 0.55 $\pm$ 0.01  |
| Polyphenols         | 0.02 $\pm$ 0.00  |
| Others <sup>a</sup> | 5.37             |

<sup>a</sup> measured as 100 - (protein-ash-fibre-oil-soluble sugars-polyphenols).

**Table S2.** Amino acid composition of WGPC. Values, presented as percentage of amino acids on total amino acid content, are mean  $\pm$  standard deviation of triplicates.

| Amino Acid                  | WGPC             |
|-----------------------------|------------------|
| Aspartic acid + asparragine | 4.54 $\pm$ 0.02  |
| Glutamic acid + Glutamine   | 40.71 $\pm$ 0.13 |
| Serine                      | 6.46 $\pm$ 0.10  |
| Histidine                   | 2.10 $\pm$ 0.03  |
| Glycine                     | 4.63 $\pm$ 0.08  |
| Threonine                   | 2.52 $\pm$ 0.01  |
| Arginine                    | 3.61 $\pm$ 0.03  |
| Alanine                     | 3.21 $\pm$ 0.12  |
| Proline                     | 6.70 $\pm$ 0.05  |
| Tyrosine                    | 3.94 $\pm$ 0.03  |
| Valine                      | 2.11 $\pm$ 0.17  |
| Methionine                  | 1.39 $\pm$ 0.16  |
| Cysteine                    | 2.31 $\pm$ 0.05  |
| Isoleucine                  | 1.87 $\pm$ 0.04  |
| Tryptophan                  | 0.49 $\pm$ 0.03  |
| Leucine                     | 6.51 $\pm$ 0.00  |
| Phenylalanine               | 5.40 $\pm$ 0.20  |
| Lysine                      | 1.80 $\pm$ 0.07  |

**Table S3.** Sequence and GenBank accession number of oligonucleotides used in RT-qPCR.

| <b>Target</b> | <b>GenBank<br/>Accession<br/>Number</b> | <b>Direction</b> | <b>Sequence (5'→3')</b> |
|---------------|-----------------------------------------|------------------|-------------------------|
| CCR2          | NM_001123041.2                          | Forward          | GTGTGTGGAGGTCCAGGAGT    |
|               |                                         | Reverse          | AAGCCAGACGTGTGATTTCC    |
| CCR5          | NM_009917                               | Forward          | CAGATGGCTTCTCCACACAA    |
|               |                                         | Reverse          | CGGAGCTTGAGAAAAACCAG    |
| CCR7          | NM_001301716.1                          | Forward          | TGGAGGCCTTTATCACCATC    |
|               |                                         | Reverse          | TGTAGGGCAGCTGGAAGACT    |
| CD36          | NM_001159556.1                          | Forward          | CAGCAAGGCCAGATATCACA    |
|               |                                         | Reverse          | GAGCTATGCAGCATGGAACA    |
| HO-1          | NM_010442                               | Forward          | CACGCATATACCCGCTACCT    |
|               |                                         | Reverse          | CCAGAGTGTTTCATTTCGAGCA  |
| IFN $\gamma$  | NM_000619.2                             | Forward          | TCCCATGGGTTGTGTGTTTA    |
|               |                                         | Reverse          | AAGCACCAGGCATGAAATCT    |
| IL-1 $\beta$  | NM_000576.2                             | Forward          | CTGTCCCTGCGTGTGAAAGA    |
|               |                                         | Reverse          | TTCTGCTTGAGAGGTGCTGA    |
| IL-6          | NM_000600.4                             | Forward          | TACCCCCAGGAGAAGATTCC    |
|               |                                         | Reverse          | TTTTCTGCCAGTGCCCTTTT    |
| IL-17         | NM_002190.2                             | Forward          | ACCAATCCCAAAAGGTCCTC    |
|               |                                         | Reverse          | ACCAATCCCAAAAGGTCCTC    |
| iNOS          | NM_000625.4                             | Forward          | ACAAGCCTACCCCTCCAGAT    |
|               |                                         | Reverse          | TCCCGTCAGTTGGTAGGTTT    |
| GAPDH         | NM_002046.6                             | Forward          | GAGTCAACGGATTGGTCGT     |
|               |                                         | Reverse          | GACAAGCTTCCCGTTCTCAG    |
| HPRT          | NM_000194                               | Forward          | ACCCACGAAGTGTTGGATA     |
|               |                                         | Reverse          | AAGCAGATGGCCACAGAACT    |
